# Supplementary material for: Instrument Artifacts Lead to Uncertainties in Parameterizations of CloudCondensation Nucleation
Source: Copernicus journal article supplement (doi:10.5194/amt-2018-164), 2018-06-01
Supplement: Supplementary file 1 [file amt-2018-164-supplement.pdf]

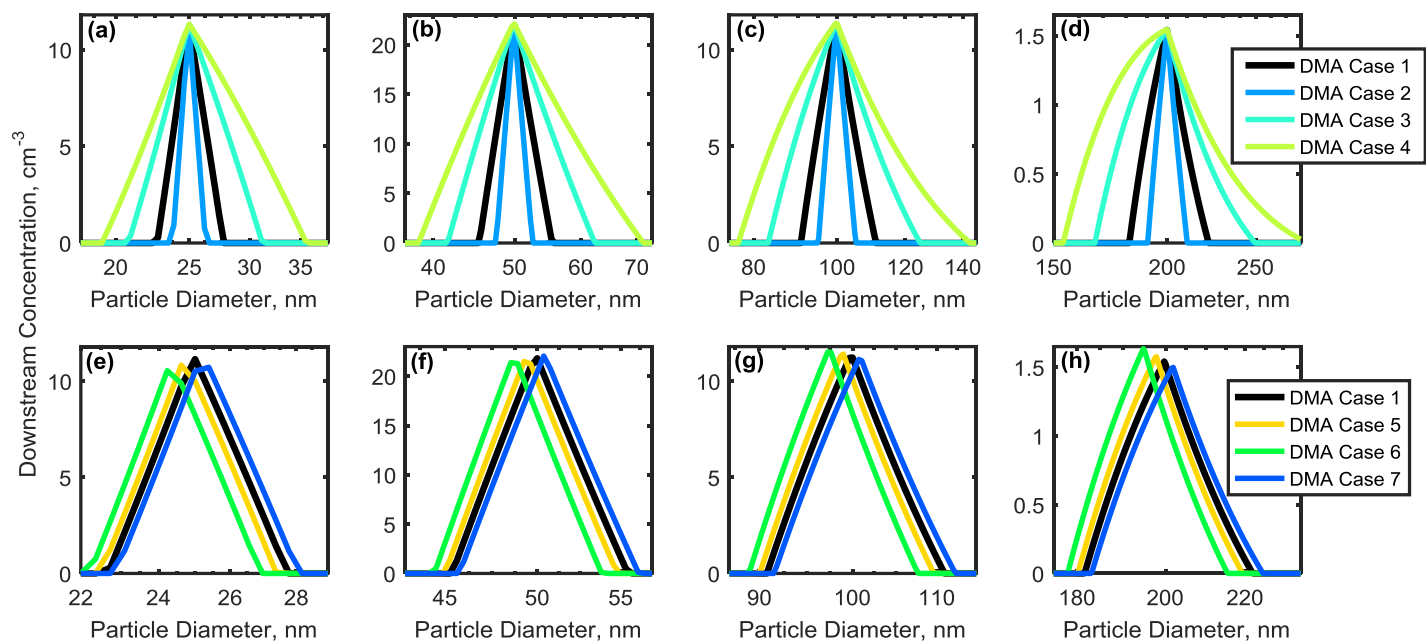

**Figure S1** (a-d) Downstream aerosols concentrations,  $\text{cm}^{-3}$ , for DMA Cases 1-4, with sheath and excess air flow  $3 \text{ L min}^{-1}$ , and aerosol and sample flow of  $0.06\text{-}0.90 \text{ L min}^{-1}$ . (e-h) Downstream concentrations for DMA Cases 1 and 5-7, with sheath air flow  $3.0 \text{ L min}^{-1}$ , sample flow  $0.30 \text{ L min}^{-1}$ , and excess air flow  $2.94\text{-}3.06 \text{ L/min}$ .
